# Supplementary material for: Starch Granule Size and Morphology of Arabidopsis thaliana Starch-Related Mutants Analyzed during Diurnal Rhythm and Development
Source: MDPI journal article supplement (doi:10.3390/molecules26195859), 2021-09-27
Supplement: s1 [file s1]

## Supplementary Figure S1

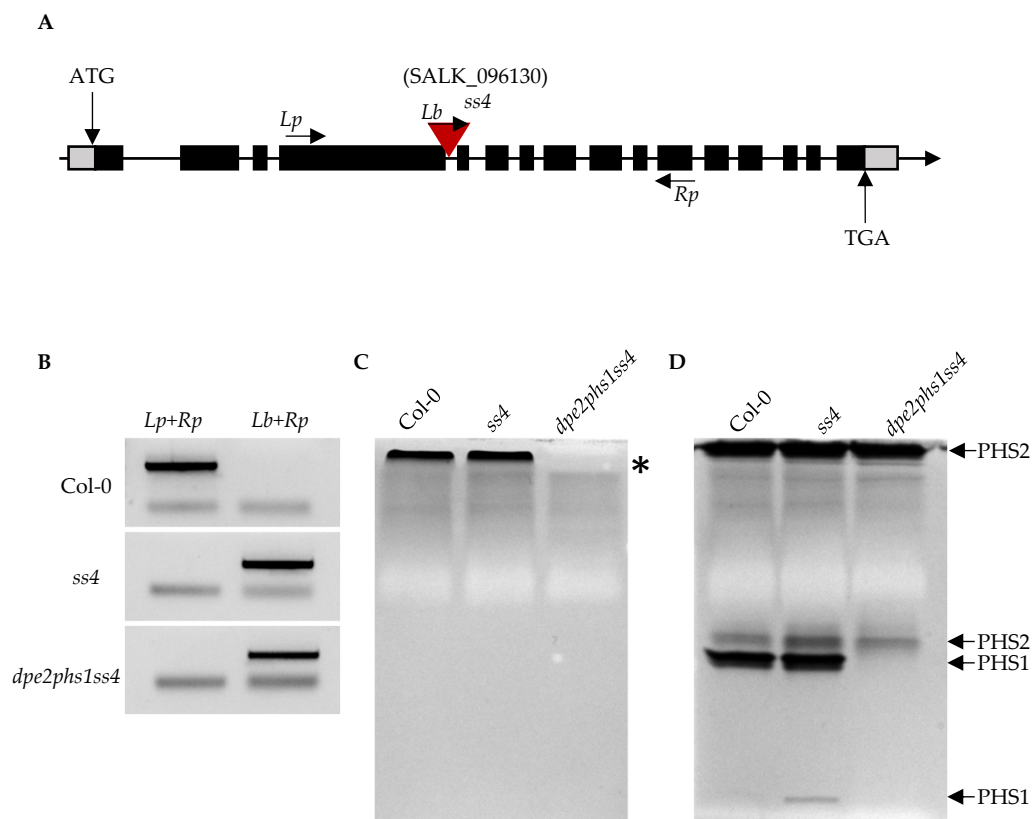

**Figure S1. Genotype confirmation of *ss4* and *dpe2phs1ss4*.** (A) Insertion site as referred to sequence information of TAIR database. (B) Confirmation for the lacking of SS4 in *ss4* and *dpe2phs1ss4*. Primers as indicated in (A). (C) Confirmation of DPE2 activity in Col-0, *ss4* and *dpe2phs1ss4* by Native-PAGE with glycogen. The targeted bands were indicated with star. (D) Confirmation of PHS1 activity by Native-PAGE with glycogen.

## Supplementary Figure S2

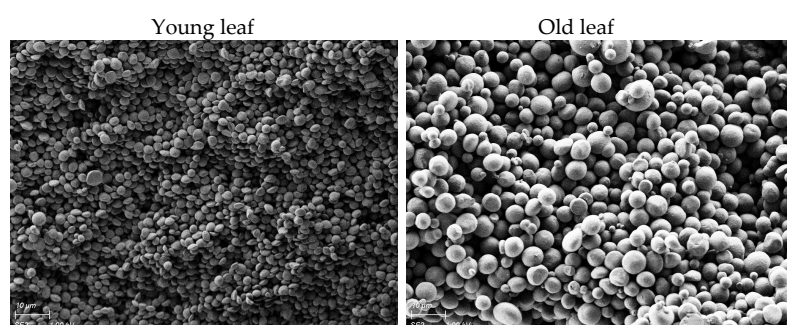

**Figure S2.** In vitro starch granules of *dpe2phs1ss4*. The scale bars are 10 µm indicated on each picture.
